# Supplementary material for: Systematic Exploitation of Multiple Receptor Conformations for Virtual Ligand Screening
Source: PLOS journal article supplement (doi:10.1371/journal.pone.0018845), 2011-05-17

**Figure S1**

**A**

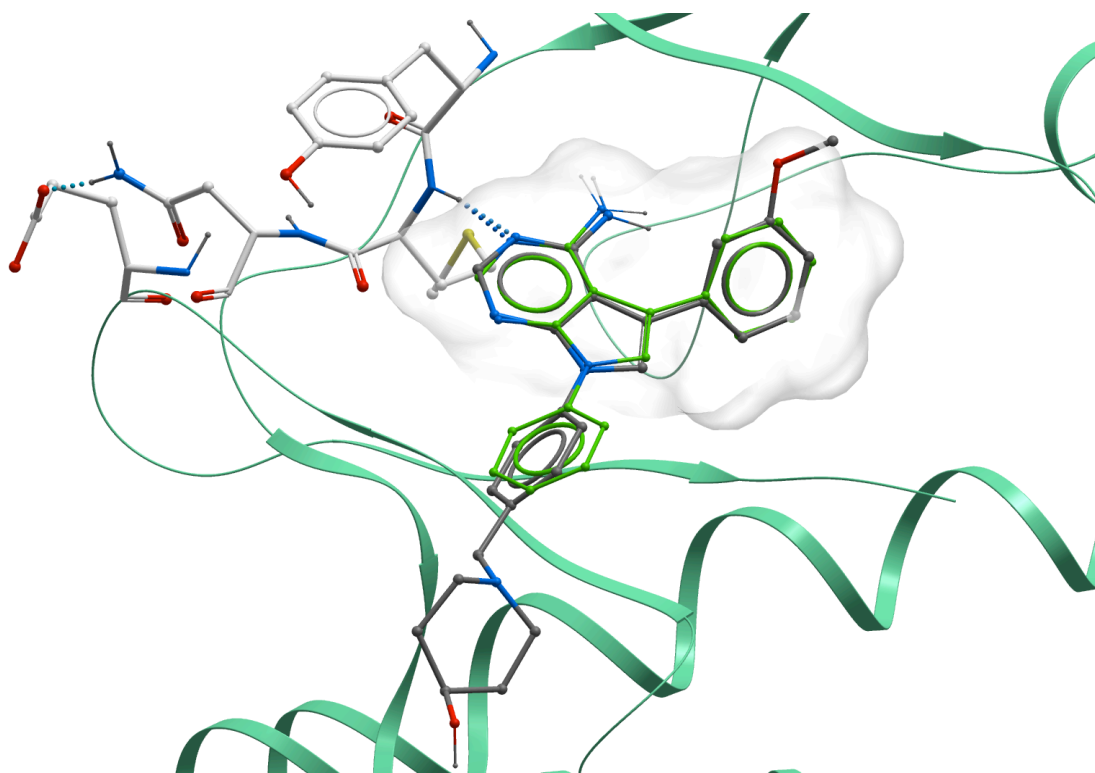

**B**

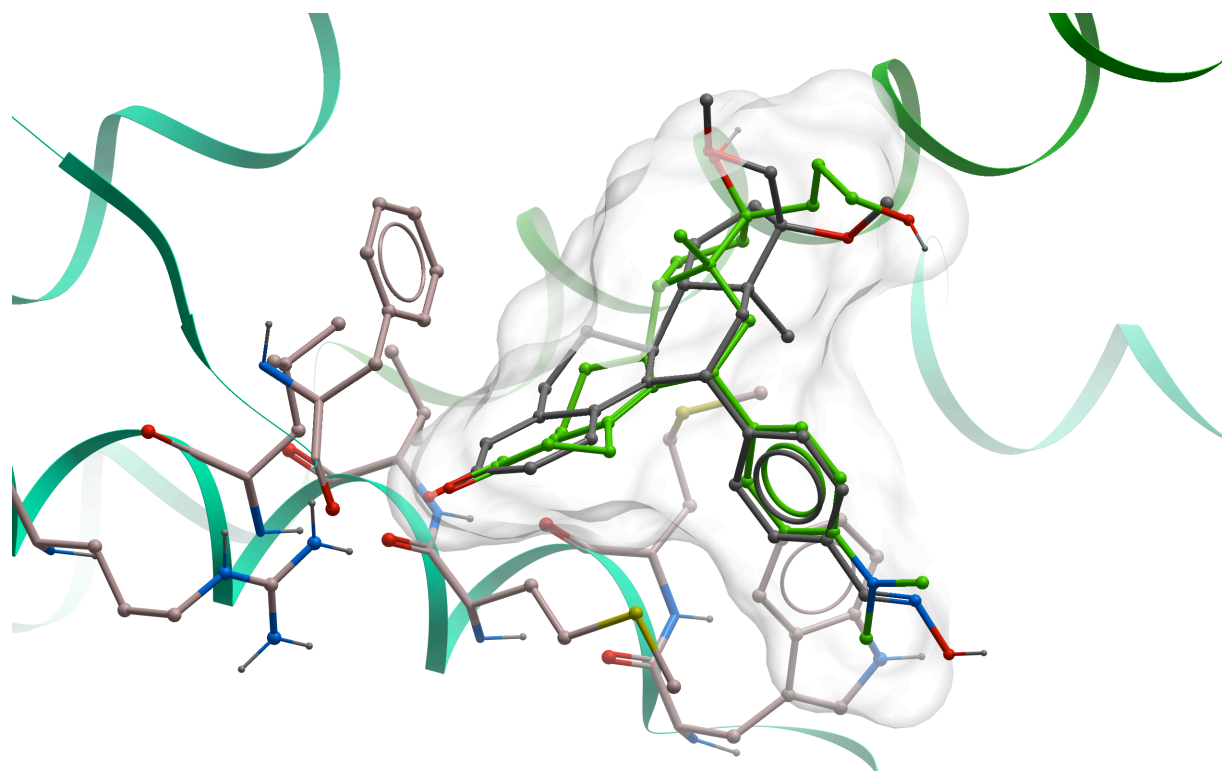

**C**

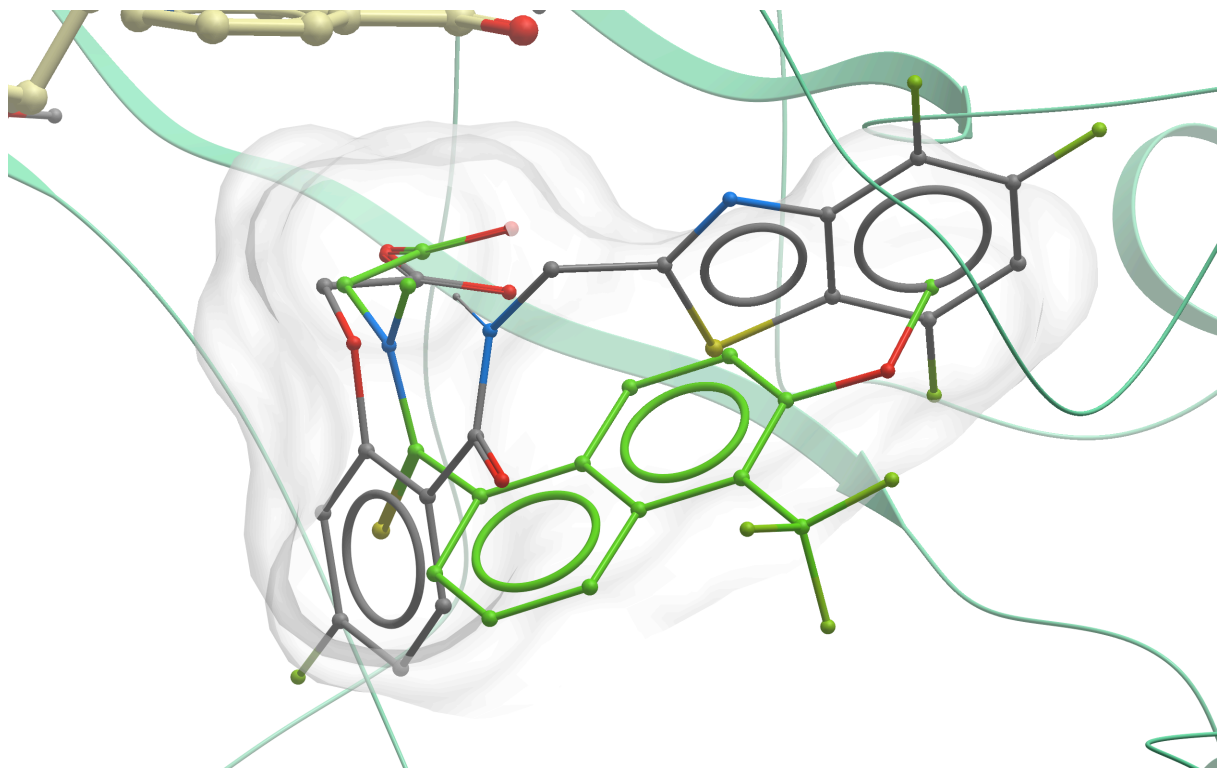

Supplement: S1 (10.1371/journal.pone.0018845.s001) [file journal.pone.0018845.s001]
